# Supplementary material for: Electron-beam-evaporated NiO X for efficient and stable semi-transparent perovskite solar cells and modules
Source: Royal Society of Chemistry journal article supplement (doi:10.1039/d4ta07138g), 2024-11-21
Supplement: d4ta07138g1.pdf [file d4ta07138g1.pdf]

Supporting Information for

---

Electron-beam-evaporated NiO<sub>x</sub> for efficient and stable semi-transparent  
perovskite solar cells and modules

Junye Pan<sup>1</sup>, Jiahui Chen<sup>1</sup>, Bingxin Duan<sup>1</sup>, Yuxi Zhang<sup>1</sup>, Peiran Hou<sup>1</sup>, Yanqing Zhu<sup>1</sup>, Min Hu<sup>2\*</sup>, Wangnan Li<sup>3</sup>, Yi-  
Bing Cheng<sup>4</sup>, Jianfeng Lu<sup>1\*</sup>

<sup>1</sup> State Key Laboratory of Silicate Materials for Architectures, Wuhan University of Technology, Wuhan 430070, China;

<sup>2</sup> School of Electronic and Electrical Engineering, Hubei Province Engineering Research Center for Intelligent Micro-Nano Medical Equipment and Key Technologies, Wuhan Textile University, Wuhan 430200, China;

<sup>3</sup> Hubei Key Laboratory of Low Dimensional Optoelectronic Material and Devices, Hubei University of Arts and Science, Xiangyang 441053, China;

<sup>4</sup> State Key Laboratory of Advanced Technology for Materials Synthesis and Processing, Wuhan University of Technology, Wuhan 430070, China;

\* E-mail: jianfeng.lu@whut.edu.cn (JL)

## TABLE OF CONTENTS

|                   |                                                                                                                   | Page |
|-------------------|-------------------------------------------------------------------------------------------------------------------|------|
|                   | Experimental section                                                                                              | S4-6 |
| <b>Figure S1</b>  | XPS spectra of Ni 2p and O 1s of NiO <sub>x</sub> film with or without annealing                                  | S7   |
| <b>Figure S2</b>  | Statistic PV parameters with different annealing temperature of NiO <sub>x</sub>                                  | S8   |
| <b>Figure S3</b>  | Statistic PV parameters with different annealing time of NiO <sub>x</sub>                                         | S9   |
| <b>Figure S4</b>  | Statistic PV parameters with different thickness of NiO <sub>x</sub>                                              | S10  |
| <b>Figure S5</b>  | Statistic PV parameters with spiro-OMeTAD MoO <sub>x</sub> or NiO <sub>x</sub> film                               | S11  |
| <b>Figure S6</b>  | Top-view SEM images of FTO SnO <sub>2</sub>  CsPbBr <sub>3</sub>  PTAA/MoO <sub>x</sub>  NiO <sub>x</sub> film    | S12  |
| <b>Figure S7</b>  | Statistic PV parameters with different buffer layers                                                              | S13  |
| <b>Figure S8</b>  | Top-view SEM images of perovskite film with different buffer layers                                               | S14  |
| <b>Figure S9</b>  | AFM images of FTO SnO <sub>2</sub>  CsPbBr <sub>3</sub> or FTO SnO <sub>2</sub>  CsPbBr <sub>3</sub>  P3HT films  | S15  |
| <b>Figure S10</b> | KPFM images of FTO SnO <sub>2</sub>  CsPbBr <sub>3</sub> or FTO SnO <sub>2</sub>  CsPbBr <sub>3</sub>  P3HT films | S16  |
| <b>Figure S11</b> | UPS spectra of CsPbBr <sub>3</sub> , NiO <sub>x</sub> , P3HT and P3HT NiO <sub>x</sub> films                      | S17  |
| <b>Figure S12</b> | XRD patterns of different films                                                                                   | S18  |
| <b>Figure S13</b> | Absorption spectra of different films                                                                             | S19  |
| <b>Figure S14</b> | The $J_{SC}$ versus light intensity of ST-PSCs with NiO <sub>x</sub> or P3HT NiO <sub>x</sub> film                | S20  |
| <b>Figure S15</b> | TPC decay curves of ST-PSCs with NiO <sub>x</sub> or P3HT NiO <sub>x</sub> film                                   | S21  |
| <b>Figure S16</b> | Statistic PV parameters with sputtered NiO <sub>x</sub> or P3HT NiO <sub>x</sub> film                             | S22  |
| <b>Figure S17</b> | Evolution of PV parameters of NiO <sub>x</sub> or P3HT NiO <sub>x</sub> devices                                   | S23  |
| <b>Figure S18</b> | Evolution of $V_{OC}$ of spiro-OMeTAD MoO <sub>x</sub> or P3HT NiO <sub>x</sub> devices                           | S24  |
| <b>Figure S19</b> | Statistic PV parameters of P3HT NiO <sub>x</sub> modules                                                          | S25  |
| <b>Figure S20</b> | Evolution of PV parameters of P3HT NiO <sub>x</sub> modules                                                       | S26  |
| <b>Figure S21</b> | Prototype photos for colorful heat-insulating photovoltaic glass                                                  | S27  |
| <b>Table S1</b>   | The atomic ratio of Ni <sup>2+</sup> /Ni <sup>3+</sup> , and the value of x in NiO <sub>x</sub>                   | S28  |
| <b>Table S2</b>   | PV parameters of ST-PSCs with different NiO <sub>x</sub> annealing temperature                                    | S29  |
| <b>Table S3</b>   | PV parameters of ST-PSCs with different NiO <sub>x</sub> annealing time                                           | S30  |
| <b>Table S4</b>   | PV parameters of ST-PSCs with different NiO <sub>x</sub> thickness                                                | S31  |
| <b>Table S5</b>   | PV parameters of spiro-OMeTAD MoO <sub>x</sub> or NiO <sub>x</sub> based ST-PSCs                                  | S32  |
| <b>Table S6</b>   | PV parameters of ST-PSCs with different buffer layers                                                             | S33  |

|                  |                                                                                        |     |
|------------------|----------------------------------------------------------------------------------------|-----|
| <b>Table S7</b>  | $E_{\text{cut-off}}$ , $E_{\text{F, edge}}$ , and $E_{\text{VB}}$ for different films  | S34 |
| <b>Table S8</b>  | Fitted results of the TRPL curves of ST-PSCs                                           | S35 |
| <b>Table S9</b>  | The reported inorganic ST-PSCs in recent years                                         | S36 |
| <b>Table S10</b> | PV parameters of ST-PSCs with sputtered NiO <sub>x</sub> or P3HT NiO <sub>x</sub> film | S37 |
| <b>Table S11</b> | PV parameters of P3HT NiO <sub>x</sub> modules                                         | S38 |
|                  | Supplementary references                                                               | S39 |

### Experimental section

#### Materials

All materials in this experiment were used as received without any further purification. Fluorine doped tin oxide (FTO, ca.  $10 \Omega \text{ sq}^{-1}$ ) glass was purchased from Yingkou Opv Tech New Energy Technology Co., Ltd.. Hydrochloric acid (HCl) was purchased from China National Pharmaceutical Group Corp.. Urea was purchased from Alfa Aesar.  $\text{SnCl}_2 \cdot 2\text{H}_2\text{O}$  was purchased from Aladdin. Lead bromide ( $\text{PbBr}_2$ ), cesium bromide (CsBr), Poly[bis(4-phenyl)(2,4,6-trimethylphenyl)amine] (PTAA) and poly(3-hexylthiophene) (P3HT) were purchased from Xi'an Yuri Solar Co., Ltd. Thioglycolic acid, 2,2',7,7'-tetrakis[N,N-di(4-methoxyphenyl)amino]-9,9'-spirobifluorene (spiro-OMeTAD), chlorobenzene (CB), toluene, 4-tert-butylphenol (tBP), molybdenum oxide ( $\text{MoO}_x$ ), lithium bis(trifluoromethanesulfonyl) imide (LiTFSI) and tris(2-(1H-pyrazol-1-yl)-4-tert-butyl pyridine)-cobalt(III)tris(bis(trifluoromethylsulfonyl)imide) (FK209) were purchased from Sigma-Aldrich. Nickel oxide ( $\text{NiO}_x$ ) particles and ITO target were purchased from ZhongNuo Advanced Material Technology Co., Ltd..

#### Device fabrication

*Small-area solar cell with spiro-OMeTAD| $\text{MoO}_x$ :* Firstly, FTO glasses were etched via a femtosecond laser machine (Universal Laser Systems, VLS2.30) and brushed by a toothbrush. Then, they were successively immersed into detergent, deionized water and ethanol for ultrasonic washing (15 min) and dried by dry-air blowing.

Next,  $\text{SnO}_2$  electron transport layers (ETLs) were prepared on the FTO surface treated with UV ozone (15 min) by chemical bath deposition (CBD) method as the following steps: (1) 5 mL HCl, 5 g urea, 1.096 g  $\text{SnCl}_2 \cdot 2\text{H}_2\text{O}$  and 100  $\mu\text{L}$  thioglycolic acid were dissolved in 400 mL deionized water to prepare  $\text{SnO}_2$  solution with a concentration of  $0.012 \text{ mol L}^{-1}$  and then stored in a refrigerator for 3 h. (2) A as-cleaned FTO glass was immersed into the  $\text{SnO}_2$  solution which was diluted to  $0.002 \text{ mol L}^{-1}$  for 2.5 h at  $83^\circ\text{C}$ , and then rinsed with deionized water and dried by dry-air blowing. (3) Above substrate was annealed at  $180^\circ\text{C}$  for 1 h.

The  $\text{CsPbBr}_3$  films were prepared by the following steps: (1) CsBr and  $\text{PbBr}_2$  powders were thermally evaporated onto the  $\text{SnO}_2$  surface with deposition rates of  $\sim 3.5$  and  $\sim 4.5 \text{ \AA s}^{-1}$  sequentially. The above step was repeated twice. (2) The obtained CsBr| $\text{PbBr}_2$  film was annealed at  $320^\circ\text{C}$  for 20 min, and then  $300^\circ\text{C}$  for 40 min.

A hole transport layer (HTL) solution was prepared by dissolving 73 mg spiro-OMeTAD into 1 mL CB followed by adding 30  $\mu\text{L}$  tBP, 18  $\mu\text{L}$  LiTFSI (520  $\text{mg mL}^{-1}$  solution in acetonitrile) and 29  $\mu\text{L}$  FK209 (300  $\text{mg mL}^{-1}$  solution in acetonitrile). 25  $\mu\text{L}$  spiro-OMeTAD solution was coated on

## Supporting Information for

---

perovskite film at 3000 rpm for 30 s with a ramp of 1000 rpm s<sup>-1</sup>. MoO<sub>x</sub> powder was thermally evaporated with a rate of 0.1 Å s<sup>-1</sup> onto the spiro-OMeTAD surface.

Finally, 180 nm ITO electrode was deposited at 37 W by radio frequency (RF) sputtering system under a pressure of 3.75 × 10<sup>-5</sup> Torr.

*Small-area solar cell with buffer layer|NiO<sub>x</sub>*: The FTO|SnO<sub>2</sub>|CsPbBr<sub>3</sub> substrate was prepared according to the above methods.

Various buffer layers were prepared by the following methods: (1) P3HT buffer layer solutions were prepared by dissolving 1/2/5 mg P3HT into 1 mL CB. 25 μL P3HT solution was coated on the perovskite film at 3000 rpm for 30 s with a ramp of 1000 rpm s<sup>-1</sup>. (2) PTAA buffer layer solution was prepared by dissolving 5 mg PTAA into 1 mL toluene. 25 μL PTAA solution was coated on the perovskite film at 3000 rpm for 30 s with a ramp of 1000 rpm s<sup>-1</sup>. (3) MoO<sub>x</sub> powder was thermally evaporated with a rate of 0.1 Å s<sup>-1</sup> onto the surface of perovskite film to prepare 5 nm MoO<sub>x</sub> buffer layer.

NiO<sub>x</sub> were evaporated by electron beam onto the CsPbBr<sub>3</sub>|buffer layer at the rate of 0.1, 0.2 and 0.3 Å s<sup>-1</sup> successively to deposit 35 nm NiO<sub>x</sub> film. The obtained film was treated at 300 °C for 60 min.

Eventually, 180 nm ITO electrode was deposited at 37 W by RF sputtering system under a pressure of 3.75 × 10<sup>-5</sup> Torr.

*Large area perovskite solar module*: Firstly, FTO glasses were etched via a femtosecond laser machine to form P1 lines and then cleaned following the above protocols. SnO<sub>2</sub> and CsPbBr<sub>3</sub> film were prepared successively by above methods. For module preparation, the P3HT was deposited by a slot-die coating process in air according to our previous established protocols.<sup>1</sup> The gap between coating head and substrate was fixed to 150 μm. The concentration of P3HT solution was 2 mg mL<sup>-1</sup> and the coating speed was 8 mm s<sup>-1</sup> with a pumping speed of 5 μL s<sup>-1</sup>. After the deposition of the P3HT and NiO<sub>x</sub> films, the samples were re-etched to form P2 lines. Eventually, 180 nm ITO electrode was deposited at 37 W by RF sputtering system under a pressure of 3.75 × 10<sup>-5</sup> Torr and effective series connected modules were formed via separate the ITO to form P3 lines.

### **Characterization:**

*Current density-voltage (J-V)* curves of various devices were measured via a source meter of Keithley 2400 and an Oriel solar simulator equipped with a xenon lamp (100 mW cm<sup>-2</sup>, calibrated by a standard silicon reference solar cell) and an AM 1.5G filter in the room environment. Metal masks with the aperture of 0.16 cm<sup>2</sup> and 10.0 cm<sup>2</sup> for small-area solar cells and large-area solar modules respectively were used to define the active area. The *J-V* scans were recorded at 10 mV steps with a scan rate of 100 mV s<sup>-1</sup> from 1.6 V to -0.1 V.

## Supporting Information for

---

*Incident photon to current conversion efficiency (IPCE) spectra* was measured via a QEX10 solar cell instrument and a photodiode used to calibrate the measurements had been calibrated via Newport.

*Quasi-stabilized power output (q-SPO) curves* were measured via a source meter of Keithley 2400 and an Oriel solar simulator equipped with a xenon lamp ( $100 \text{ mW cm}^{-2}$ , calibrated by a standard silicon reference solar cell) and an AM 1.5G filter in the room environment and recorded at the potential around the maximum power point for 120 s.

*Scanning Electron Microscopy (SEM) images* were recorded via the Hitachi S4800 and Zeiss Gemini 300.

*X-ray diffraction (XRD) patterns* were obtained via the Bruker D8 Advance diffractometer equipped with a Cu Ka X-ray tube operated at 40 kV and 40 mA using a step size of  $0.02^\circ$  and a time per step of 0.12 s.

*Ultraviolet–visible (UV–Vis) absorption spectra* were obtained via UV-vis spectrophotometer (lambda 750S, PerkinElmer).

*Steady-state photoluminescence (PL) and time-resolved PL (TRPL) decay curves* were measured via the Delta Flex Flux Fluorescence Lifetime System (HORIBA Scientific Company, Japan) with 485 nm laser excitation.

*Space charge limited current (SCLC)* was measured via a Chenhua electrochemistry workstation in the dark.

*Dark J-V curves* were measured via a Keithley 2400 source meter and recorded at 10 mV steps with a scan rate of  $100 \text{ mV s}^{-1}$  from 1.6 V to -0.1V in the dark.

*Transient photovoltage (TPV) and transient photocurrent (TPC) tests* were used to record the attenuation process of photovoltage and photocurrent.

*Mott-Schottky analyses* were measured via an impedance spectrum analyzer (Chenhua) in the dark and the frequency is set at 999.682 Hz.

*Environmental stability test:* According to the protocol of ISOS-D-2, the non-encapsulated small-area solar cells were aged at the condition with a temperature of  $65 \text{ }^\circ\text{C}$  and a relative humidity (RH) of  $55 \pm 10\%$  in the dark and regularly measured *J-V* curves. According to the protocol of ISOS-D-1, the non-encapsulated large-area solar modules were aged at the condition with a temperature of  $25 \pm 5 \text{ }^\circ\text{C}$  and a RH of  $35 \pm 5\%$  in the dark and regularly measured *J-V* curves.

*Heat-insulating performance* were measured via an Oriel solar simulator equipped with a xenon lamp ( $100 \text{ mW cm}^{-2}$ , calibrated by a standard silicon reference solar cell) and an AM 1.5G filter in the room environment.

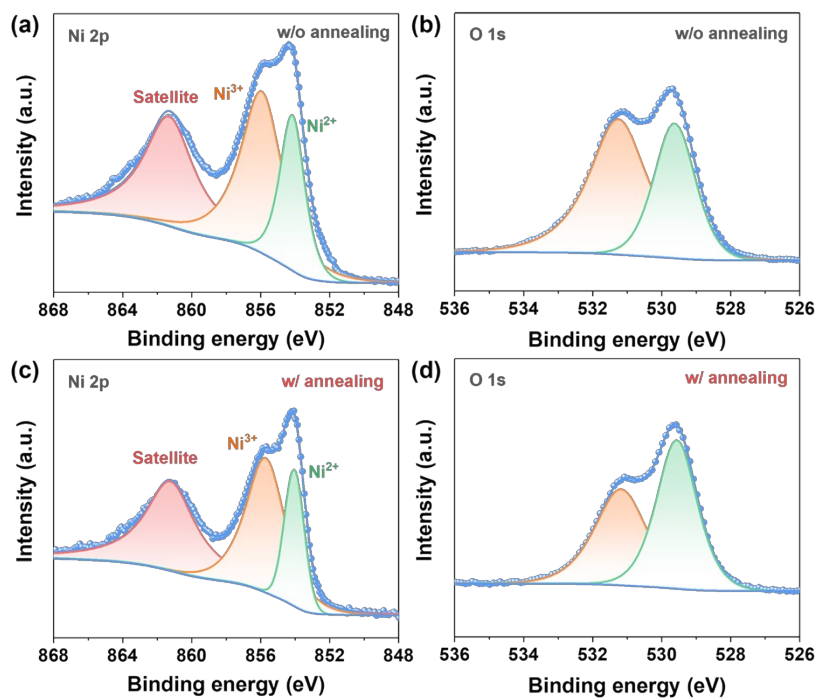

**Figure S1.** XPS spectra of (a) Ni 2p, and (b) O 1s of NiO<sub>x</sub> film without annealing. XPS spectra of (c) Ni 2p, and (d) O 1s of NiO<sub>x</sub> film with annealing in air condition.

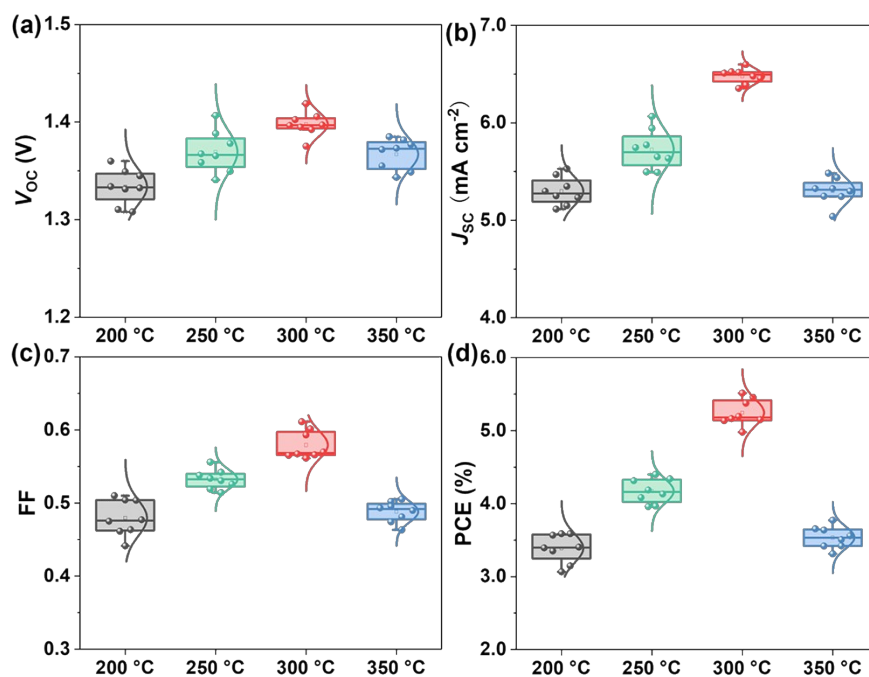

**Figure S2.** Statistics (a)  $V_{OC}$ , (b)  $J_{SC}$ , (c) FF, and (d) PCE distributions of 8 independent cells of ST-PSCs based on NiO<sub>x</sub> with different annealing temperature. All devices were measured under AM 1.5G 1-sun irradiation with a metal mask of 0.16 cm<sup>2</sup>.



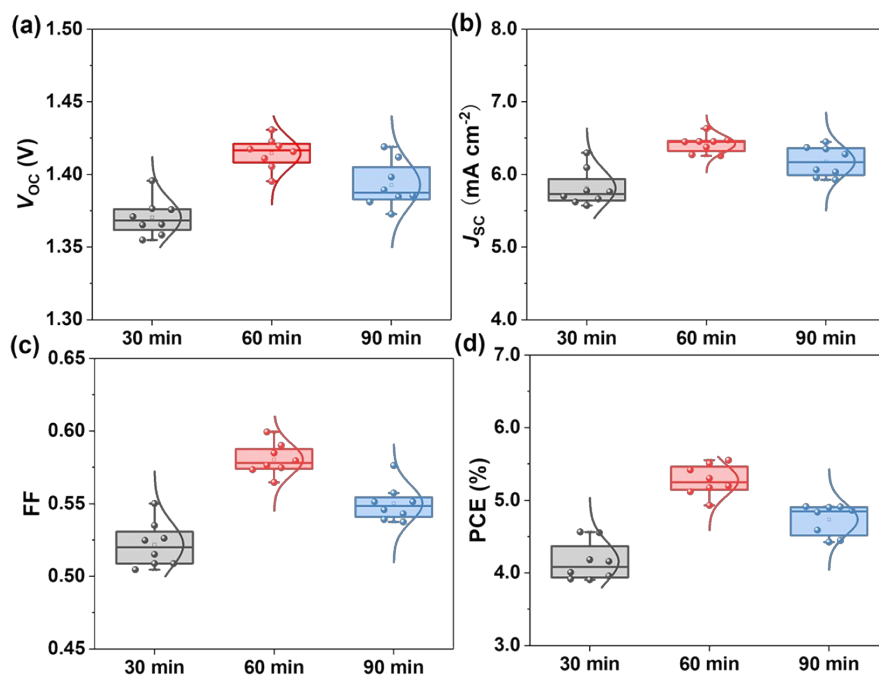

**Figure S3.** Statistics (a)  $V_{oc}$ , (b)  $J_{sc}$ , (c) FF, and (d) PCE distributions of 8 independent cells of ST-PSCs based on NiO<sub>x</sub> with different annealing time. All devices were measured under AM 1.5G 1-sun irradiation with a metal mask of 0.16 cm<sup>2</sup>.

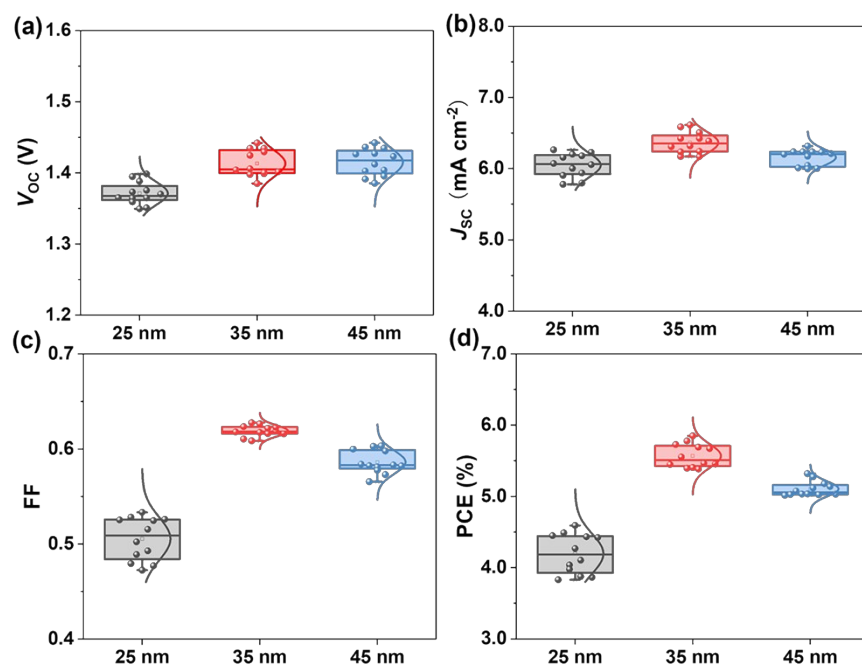

**Figure S4.** Statistics (a)  $V_{OC}$ , (b)  $J_{SC}$ , (c) FF, and (d) PCE distributions of 12 independent cells of ST-PSCs based on NiO<sub>x</sub> with different thickness. All devices were measured under AM 1.5G 1-sun irradiation with a metal mask of 0.16 cm<sup>2</sup>.

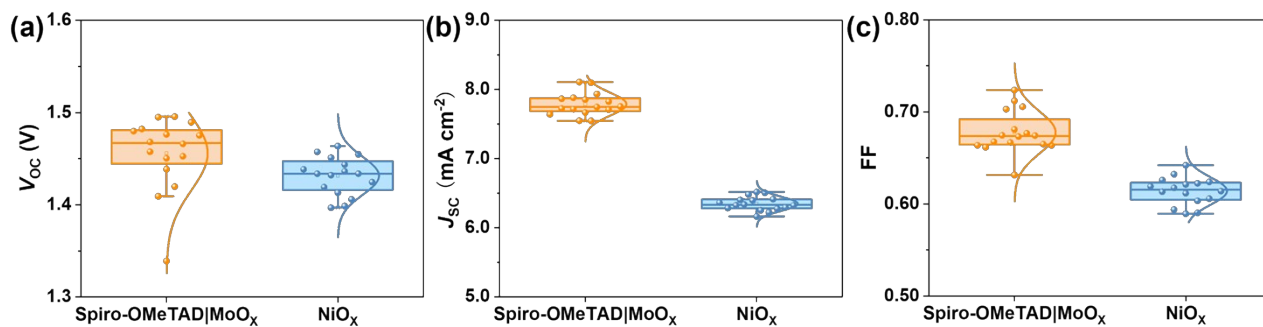

**Figure S5.** Statistics (a)  $V_{OC}$ , (b)  $J_{SC}$ , and (c) FF distributions of 16 independent cells of ST-PSCs with spiro-OMeTAD|MoO<sub>x</sub> or NiO<sub>x</sub> film. All devices were measured under AM 1.5G 1-sun irradiation with a metal mask of 0.16 cm<sup>2</sup>.

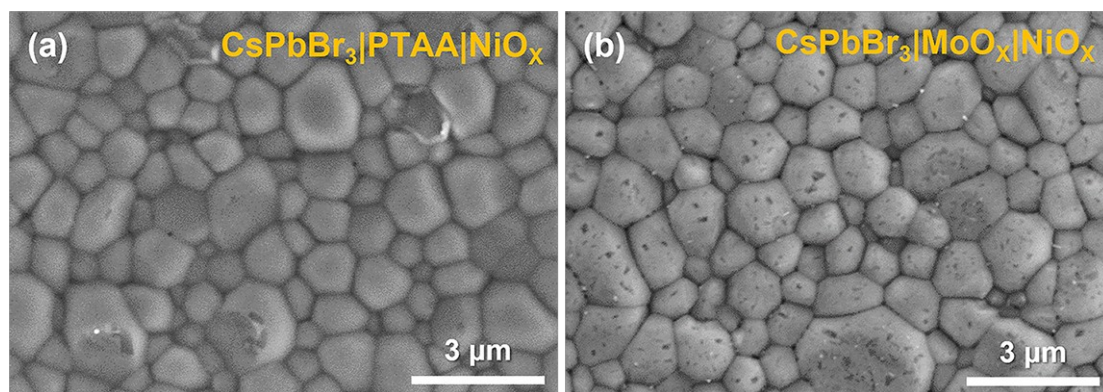

**Figure S6.** Top-view SEM images of (a)  $\text{FTO}|\text{SnO}_2|\text{CsPbBr}_3|\text{PTAA}|\text{NiO}_x$ , (b)  $\text{FTO}|\text{SnO}_2|\text{CsPbBr}_3|\text{MoO}_x|\text{NiO}_x$  films.

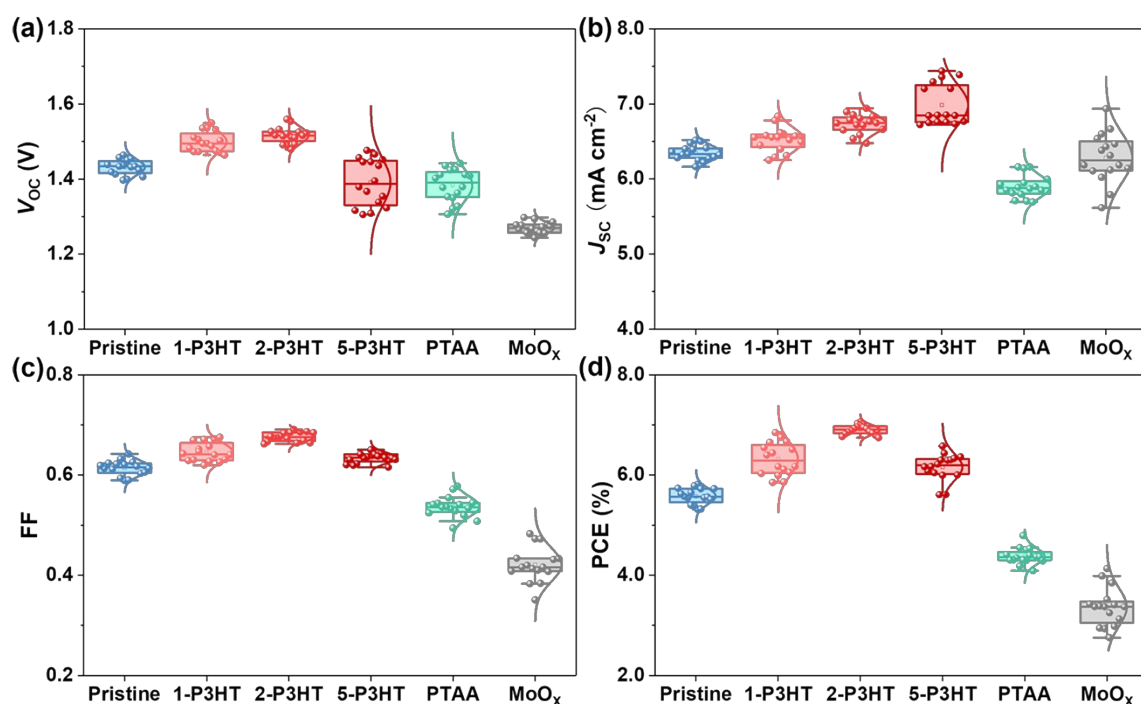

**Figure S7.** Statistics (a)  $V_{OC}$ , (b)  $J_{SC}$ , (c) FF, and (d) PCE distributions of 16 independent cells of ST-PSCs with different buffer layers. The device structure is glass|FTO|SnO<sub>2</sub>|CsPbBr<sub>3</sub>|buffer layer|NiO<sub>x</sub>|ITO. These buffer layers are fabricated based on 1 mg mL<sup>-1</sup> P3HT (1-P3HT), 2 mg mL<sup>-1</sup> P3HT (2-P3HT), 5 mg mL<sup>-1</sup> P3HT (5-P3HT), 5 mg mL<sup>-1</sup> PTAA, and 5 nm MoO<sub>x</sub>, respectively. All devices were measured under AM 1.5G 1-sun irradiation with a metal mask of 0.16 cm<sup>2</sup>.

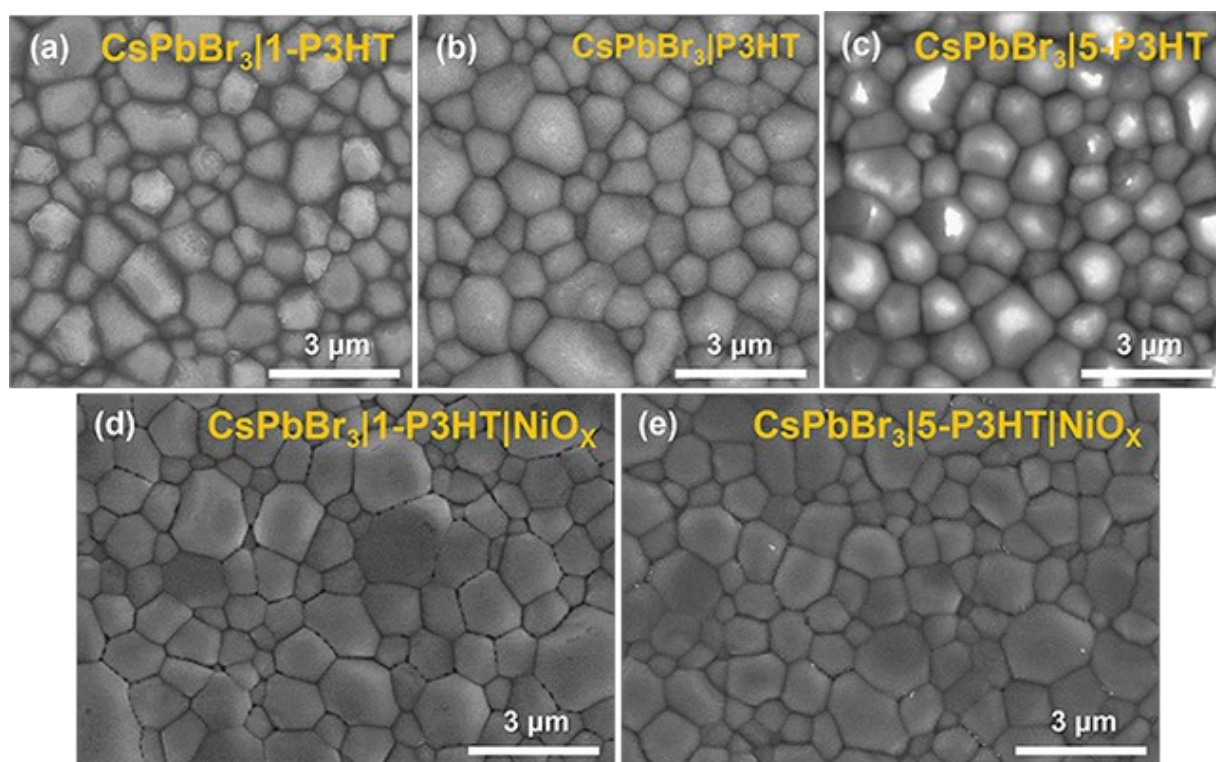

**Figure S8.** Top-view SEM images of (a) FTO|SnO<sub>2</sub>|CsPbBr<sub>3</sub>|1 mg mL<sup>-1</sup> P3HT, (b) FTO|SnO<sub>2</sub>|CsPbBr<sub>3</sub>|2 mg mL<sup>-1</sup> P3HT, (c) FTO|SnO<sub>2</sub>|CsPbBr<sub>3</sub>|5 mg mL<sup>-1</sup> P3HT, (d) FTO|SnO<sub>2</sub>|CsPbBr<sub>3</sub>|1 mg mL<sup>-1</sup> P3HT|NiO<sub>x</sub>, (e) FTO|SnO<sub>2</sub>|CsPbBr<sub>3</sub>|5 mg mL<sup>-1</sup> P3HT|NiO<sub>x</sub> films.

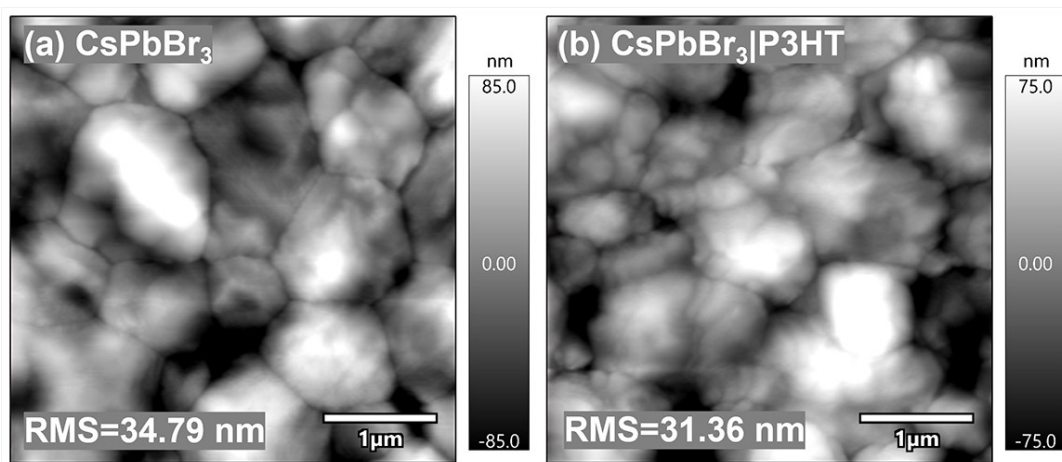

**Figure S9.** AFM images of (a) FTO|SnO<sub>2</sub>|CsPbBr<sub>3</sub>, (b) FTO|SnO<sub>2</sub>|CsPbBr<sub>3</sub>|2 mg mL<sup>-1</sup> P3HT films.

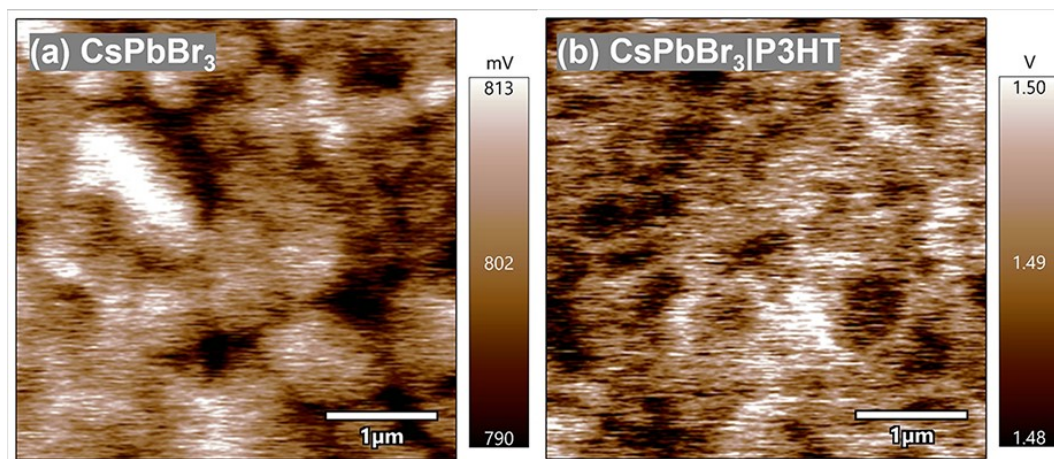

**Figure S10.** KPFM images of (a)  $\text{FTO}|\text{SnO}_2|\text{CsPbBr}_3$ , (b)  $\text{FTO}|\text{SnO}_2|\text{CsPbBr}_3|2\text{ mg mL}^{-1}\text{ P3HT}$  films.



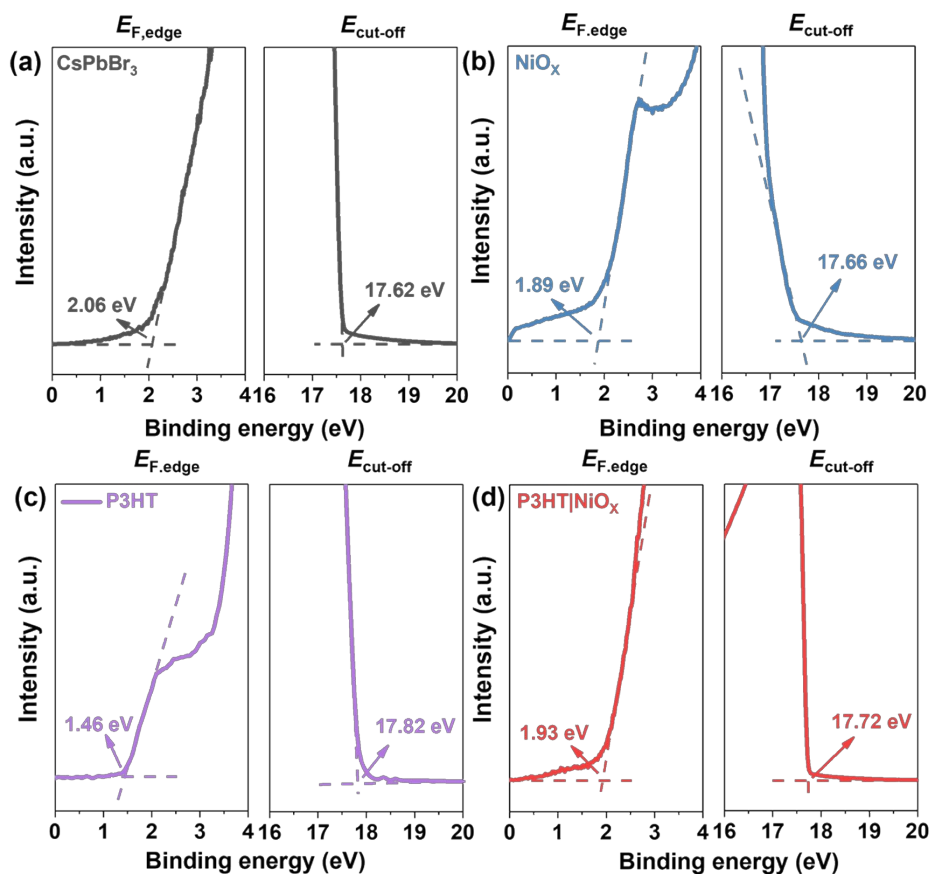

**Figure S11.** UPS spectra of (a) CsPbBr<sub>3</sub>, (b) NiO<sub>x</sub>, (c) P3HT, and (d) P3HT|NiO<sub>x</sub> films, showing the Fermi edge ( $E_{F,edge}$ ), and cut-off energy ( $E_{cut-off}$ ).

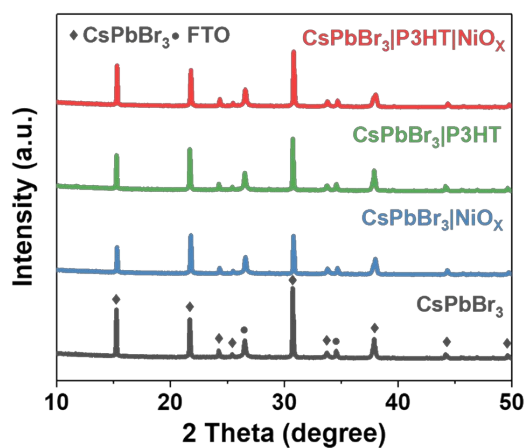

**Figure S12.** XRD patterns of FTO|SnO<sub>2</sub>|CsPbBr<sub>3</sub>, FTO|SnO<sub>2</sub>|CsPbBr<sub>3</sub>|NiO<sub>x</sub>, FTO|SnO<sub>2</sub>|CsPbBr<sub>3</sub>|P3HT, and FTO|SnO<sub>2</sub>|CsPbBr<sub>3</sub>|P3HT|NiO<sub>x</sub> films.

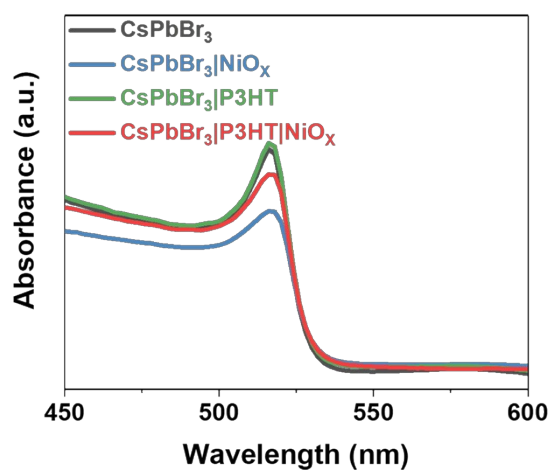

**Figure S13.** Absorption spectra of FTO|SnO<sub>2</sub>|CsPbBr<sub>3</sub>, FTO|SnO<sub>2</sub>|CsPbBr<sub>3</sub>|NiO<sub>x</sub>, FTO|SnO<sub>2</sub>|CsPbBr<sub>3</sub>|P3HT, and FTO|SnO<sub>2</sub>|CsPbBr<sub>3</sub>|P3HT|NiO<sub>x</sub> films.

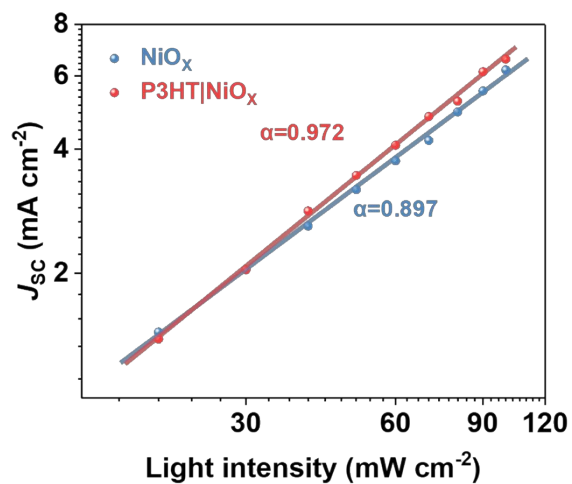

**Figure S14.** The  $J_{SC}$  versus light intensity plots of ST-PSCs with NiO<sub>x</sub> or P3HT|NiO<sub>x</sub> film.

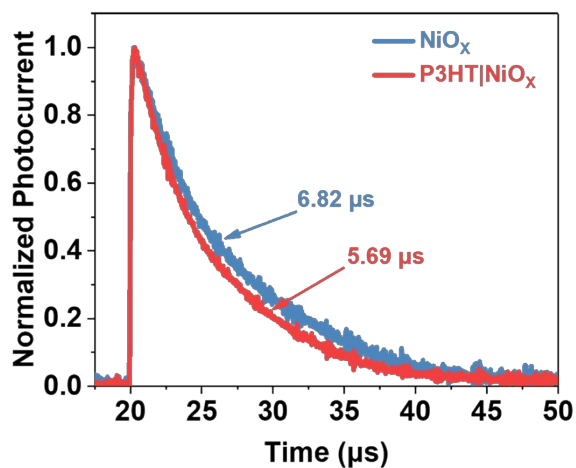

**Figure S15.** Transient photocurrent (TPC) decay curves of ST-PSCs with NiO<sub>x</sub> or P3HT|NiO<sub>x</sub> film.

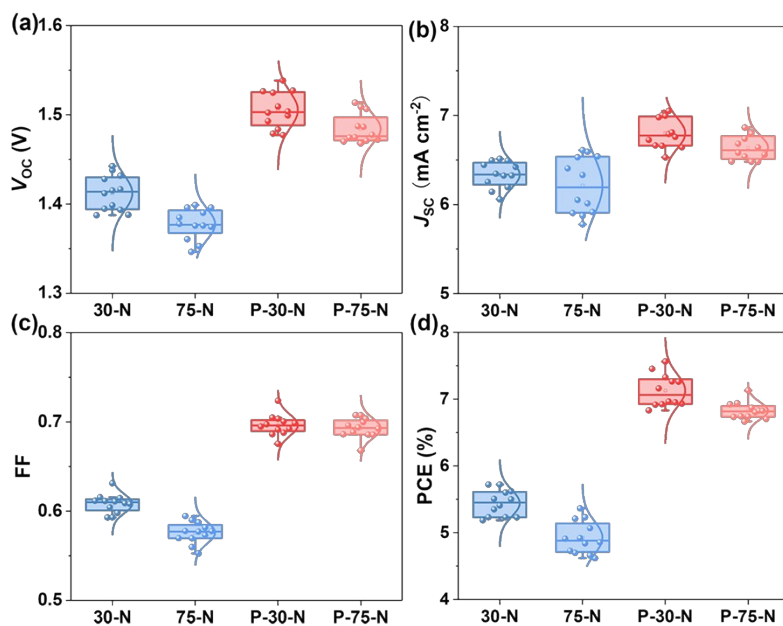

**Figure S16.** Statistics (a)  $V_{oc}$ , (b)  $J_{sc}$ , (c) FF, and (d) PCE distributions of 12 independent cells of ST-PSCs with NiO<sub>x</sub> or P3HT|NiO<sub>x</sub> film prepared by different sputtering powers. These films are fabricated based on 30 W NiO<sub>x</sub> (30-N), 75 W NiO<sub>x</sub> (75-N), P3HT|30 W NiO<sub>x</sub> (P-30-N), and P3HT|75 W NiO<sub>x</sub> (P-75-N). All devices were measured under AM 1.5G 1-sun irradiation with a metal mask of 0.16 cm<sup>2</sup>.

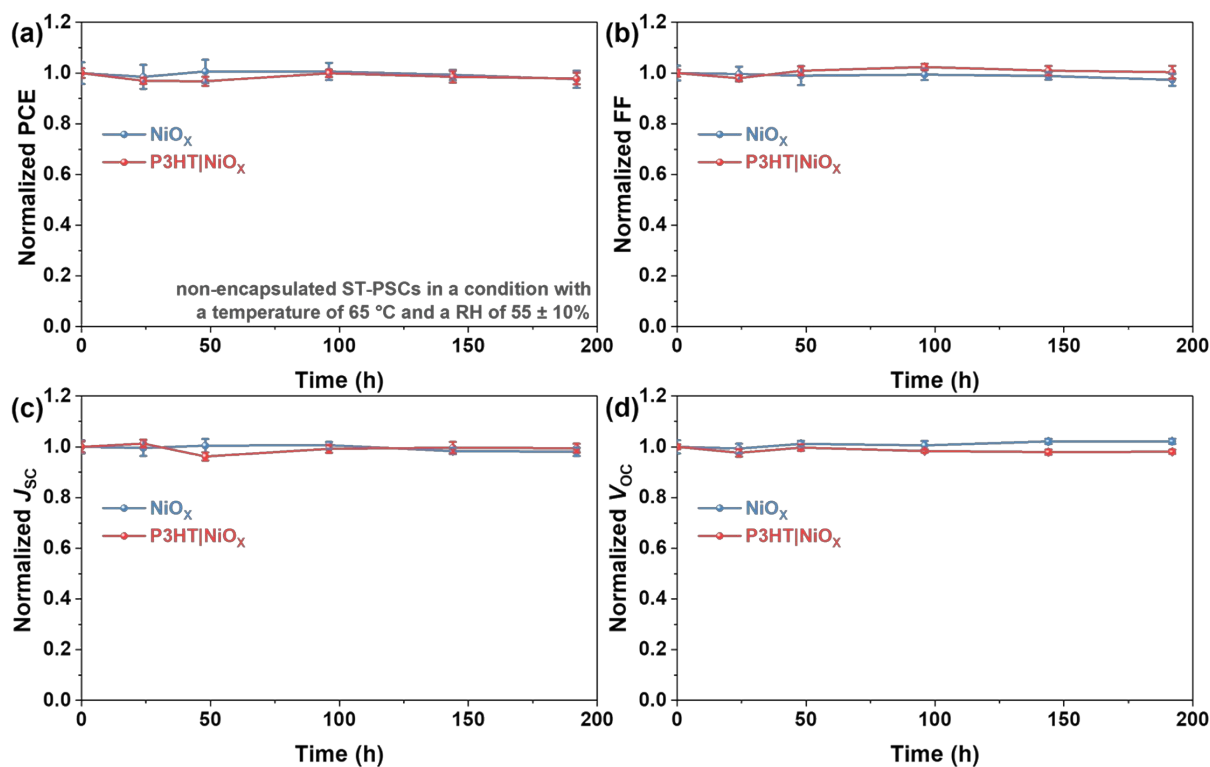

**Figure S17.** Evolution of (a) PCE, (b) FF, (c)  $J_{sc}$ , and (d)  $V_{oc}$  originating from non-encapsulated devices with  $\text{NiO}_x$  or  $\text{P3HT|NiO}_x$  film aging at a condition with a temperature of 65 °C and a RH of 55 ± 10% in the dark. All devices were measured under AM 1.5G 1-sun irradiation with a metal mask of 0.16 cm<sup>2</sup>.

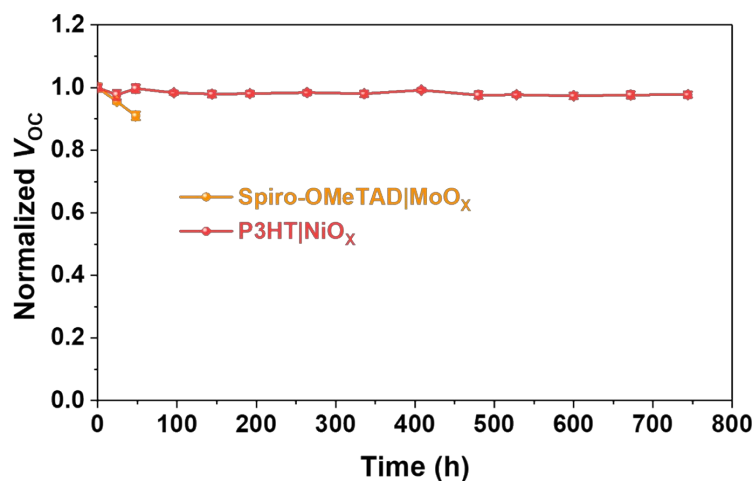

**Figure S18.** Evolution of  $V_{OC}$  originating from non-encapsulated devices with spiro-OMeTAD|MoO<sub>x</sub> or P3HT|NiO<sub>x</sub> film aging at a condition with a temperature of 65 °C and a RH of 55 ± 10% in the dark. All devices were measured under AM 1.5G 1-sun irradiation with a metal mask of 0.16 cm<sup>2</sup>.



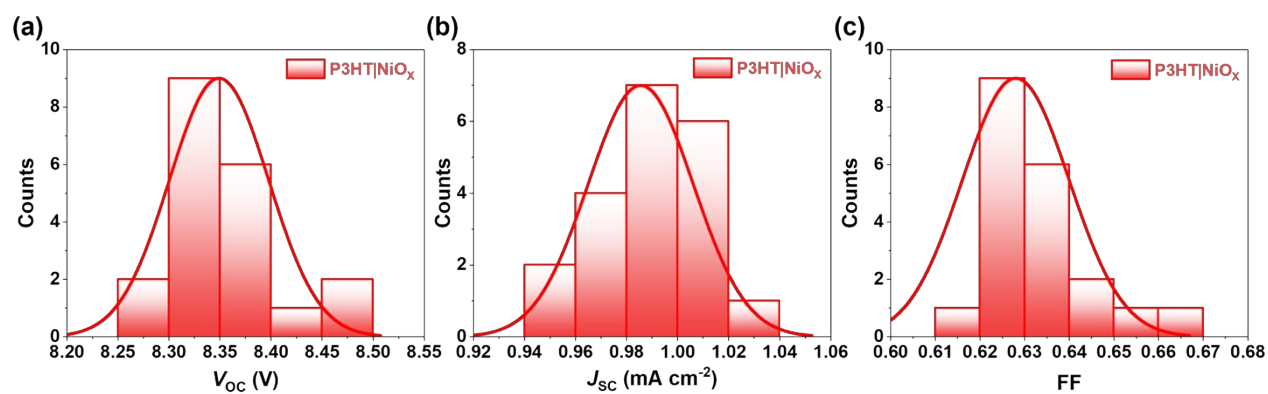

**Figure S19.** (a)  $V_{OC}$ , (b)  $J_{SC}$ , and (c) FF distributions of 20 independent modules modification. All modules were measured under AM 1.5G 1-sun irradiation with a metal mask of 10.0 cm<sup>2</sup>;

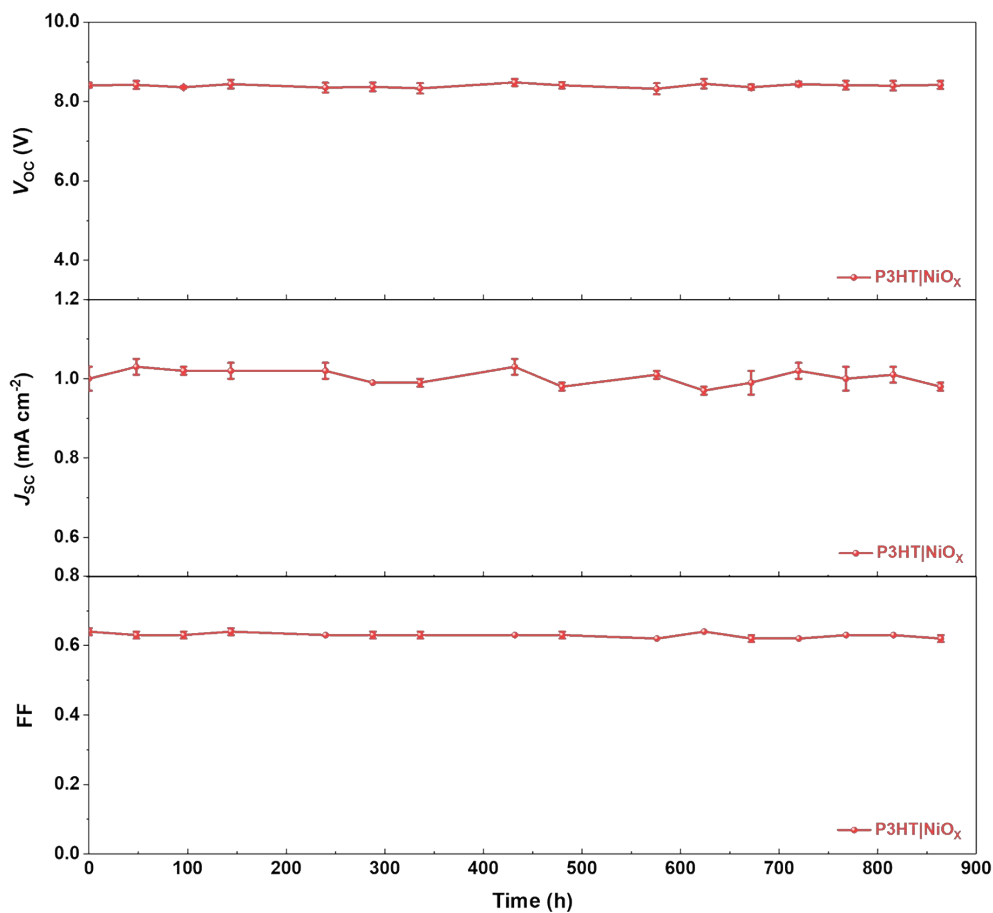

**Figure S20.** Evolution of  $V_{oc}$ ,  $J_{sc}$ , and FF originating from non-encapsulated modules aging at a condition with a temperature of  $25 \pm 5$  °C and a RH of  $35 \pm 5\%$  in the dark. All devices were measured under AM 1.5G 1-sun irradiation with a metal mask of  $10 \text{ cm}^2$ .

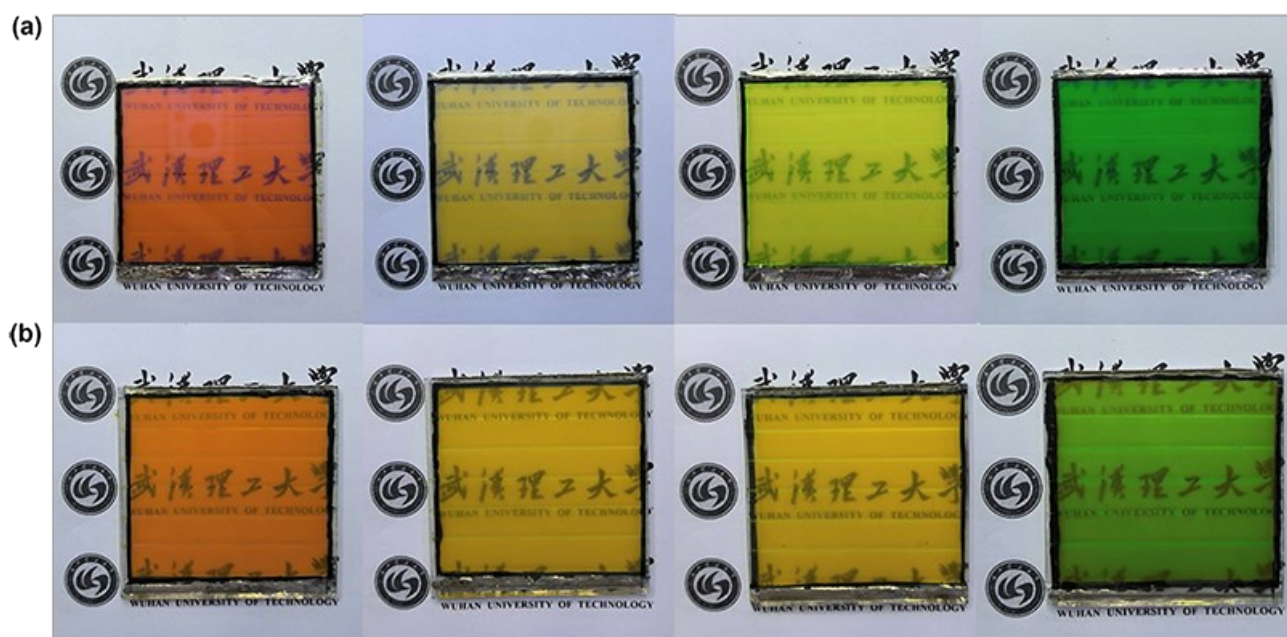

**Figure S21.** Prototype photos of (a) ordinary glass side and (b) photovoltaic glass side for colorful heat-insulating photovoltaic glass. The device structure is glass|ST-PSM|filter|glass.

## Supporting Information for

---

**Table S1.** The atomic ratio of Ni<sup>2+</sup>/Ni<sup>3+</sup>, and the value of x in NiO<sub>x</sub> with or without annealing under air condition.

---

| Samples       | Atomic ratio of Ni <sup>2+</sup> /Ni <sup>3+</sup> | The value of x |
|---------------|----------------------------------------------------|----------------|
| w/o annealing | 0.55                                               | 1.32           |
| w/ annealing  | 0.50                                               | 1.33           |

---

## Supporting Information for

**Table S2.** Photovoltaic performance of ST-PSCs based on NiO<sub>x</sub> with different annealing temperature. All devices were measured under AM 1.5G 1-sun irradiation with a metal mask of 0.16 cm<sup>2</sup>.

| Temperature (°C) |          | $V_{oc}$ (V) | $J_{sc}$ (mA cm <sup>-2</sup> ) | FF          | PCE (%)   |
|------------------|----------|--------------|---------------------------------|-------------|-----------|
| 200              | Champion | 1.33         | 5.3                             | 0.50        | 3.6       |
|                  | Average  | 1.33 ± 0.02  | 5.3 ± 0.1                       | 0.48 ± 0.02 | 3.4 ± 0.2 |
| 250              | Champion | 1.37         | 6.1                             | 0.53        | 4.4       |
|                  | Average  | 1.37 ± 0.02  | 5.7 ± 0.2                       | 0.53 ± 0.01 | 4.2 ± 0.2 |
| 300              | Champion | 1.40         | 6.5                             | 0.61        | 5.5       |
|                  | Average  | 1.40 ± 0.01  | 6.5 ± 0.1                       | 0.58 ± 0.02 | 5.2 ± 0.2 |
| 350              | Champion | 1.37         | 5.4                             | 0.51        | 3.8       |
|                  | Average  | 1.37 ± 0.02  | 5.3 ± 0.1                       | 0.49 ± 0.01 | 3.5 ± 0.2 |

## Supporting Information for

**Table S3.** Photovoltaic performance of ST-PSCs based on NiO<sub>x</sub> with different annealing time. All devices were measured under AM 1.5G 1-sun irradiation with a metal mask of 0.16 cm<sup>2</sup>.

|    | Time (min) | $V_{oc}$ (V) | $J_{sc}$ (mA cm <sup>-2</sup> ) | FF          | PCE (%)   |
|----|------------|--------------|---------------------------------|-------------|-----------|
| 30 | Champion   | 1.35         | 6.3                             | 0.53        | 4.6       |
|    | Average    | 1.37 ± 0.01  | 5.8 ± 0.3                       | 0.52 ± 0.02 | 4.2 ± 0.3 |
| 60 | Champion   | 1.43         | 6.5                             | 0.60        | 5.6       |
|    | Average    | 1.41 ± 0.01  | 6.4 ± 0.1                       | 0.58 ± 0.01 | 5.3 ± 0.2 |
| 90 | Champion   | 1.42         | 6.3                             | 0.55        | 4.9       |
|    | Average    | 1.39 ± 0.02  | 6.2 ± 0.2                       | 0.55 ± 0.01 | 4.7 ± 0.2 |

## Supporting Information for

**Table S4.** Photovoltaic performance of ST-PSCs based on NiO<sub>x</sub> with different thickness. All devices were measured under AM 1.5G 1-sun irradiation with a metal mask of 0.16 cm<sup>2</sup>.

| Thickness (nm) |          | $V_{OC}$ (V) | $J_{SC}$ (mA cm <sup>-2</sup> ) | FF          | PCE (%)   |
|----------------|----------|--------------|---------------------------------|-------------|-----------|
| 25             | Champion | 1.39         | 6.2                             | 0.53        | 4.6       |
|                | Average  | 1.37 ± 0.02  | 6.0 ± 0.2                       | 0.51 ± 0.02 | 4.2 ± 0.3 |
| 35             | Champion | 1.44         | 6.6                             | 0.62        | 5.8       |
|                | Average  | 1.41 ± 0.02  | 6.4 ± 0.2                       | 0.62 ± 0.01 | 5.6 ± 0.2 |
| 45             | Champion | 1.42         | 6.2                             | 0.60        | 5.3       |
|                | Average  | 1.41 ± 0.02  | 6.2 ± 0.1                       | 0.59 ± 0.01 | 5.1 ± 0.1 |

## Supporting Information for

**Table S5.** Photovoltaic performance, AVT, and LUE of ST-PSCs with spiro-OMeTAD|MoO<sub>x</sub> or NiO<sub>x</sub> film. All devices were measured under AM 1.5G 1-sun irradiation with a metal mask of 0.16 cm<sup>2</sup>.

| Samples                               |          | $V_{oc}$<br>(V) | $J_{sc}$<br>(mA cm <sup>-2</sup> ) | FF          | PCE<br>(%) | AVT<br>(%) | LUE<br>(%) |
|---------------------------------------|----------|-----------------|------------------------------------|-------------|------------|------------|------------|
| Spiro-<br>OMeTAD<br> MoO <sub>x</sub> | Champion | 1.48            | 8.1                                | 0.70        | 8.4        | 42.8       | 3.6        |
|                                       | Average  | 1.46 ± 0.04     | 7.8 ± 0.2                          | 0.68 ± 0.02 | 7.7 ± 0.3  |            |            |
| NiO <sub>x</sub>                      | Champion | 1.44            | 6.5                                | 0.62        | 5.8        | 51.3       | 3.0        |
|                                       | Average  | 1.43 ± 0.02     | 6.3 ± 0.1                          | 0.61 ± 0.01 | 5.6 ± 0.2  |            |            |



## Supporting Information for

**Table S6.** Photovoltaic performance of ST-PSCs with different buffer layers. All devices were measured under AM 1.5G 1-sun irradiation with a metal mask of 0.16 cm<sup>2</sup>.

| Buffer layers    |          | $V_{OC}$<br>(V) | $J_{SC}$<br>(mA cm <sup>-2</sup> ) | FF          | PCE<br>(%) |
|------------------|----------|-----------------|------------------------------------|-------------|------------|
| Pristine         | Champion | 1.44            | 6.5                                | 0.62        | 5.8        |
|                  | Average  | 1.43 ± 0.02     | 6.3 ± 0.1                          | 0.61 ± 0.01 | 5.6 ± 0.2  |
| 1-P3HT           | Champion | 1.55            | 6.6                                | 0.67        | 6.9        |
|                  | Average  | 1.50 ± 0.03     | 6.5 ± 0.2                          | 0.65 ± 0.02 | 6.3 ± 0.3  |
| 2-P3HT           | Champion | 1.51            | 6.8                                | 0.69        | 7.1        |
|                  | Average  | 1.52 ± 0.02     | 6.7 ± 0.1                          | 0.68 ± 0.01 | 6.9 ± 0.1  |
| 5-P3HT           | Champion | 1.48            | 6.9                                | 0.65        | 6.6        |
|                  | Average  | 1.39 ± 0.06     | 7.0 ± 0.3                          | 0.63 ± 0.01 | 6.2 ± 0.3  |
| PTAA             | Champion | 1.44            | 6.1                                | 0.54        | 4.8        |
|                  | Average  | 1.38 ± 0.04     | 5.9 ± 0.2                          | 0.54 ± 0.02 | 4.4 ± 0.2  |
| MoO <sub>x</sub> | Champion | 1.26            | 6.9                                | 0.47        | 4.1        |
|                  | Average  | 1.27 ± 0.02     | 6.3 ± 0.3                          | 0.42 ± 0.03 | 3.4 ± 0.4  |

## Supporting Information for

**Table S7.** Calculated valence band ( $E_{\text{VB}}$ ) from  $E_{\text{cut-off}}$  and  $E_{\text{F, edge}}$  for the CsPbBr<sub>3</sub>, NiO<sub>x</sub>, P3HT, and P3HT|NiO<sub>x</sub>.

| Samples               | $E_{\text{cut-off}}$<br>(eV) | $E_{\text{F, edge}}$<br>(eV) | $E_{\text{VB}}$<br>(eV) |
|-----------------------|------------------------------|------------------------------|-------------------------|
| CsPbBr <sub>3</sub>   | 17.62                        | 2.06                         | -5.66                   |
| NiO <sub>x</sub>      | 17.66                        | 1.89                         | -5.45                   |
| P3HT                  | 17.82                        | 1.46                         | -4.86                   |
| P3HT NiO <sub>x</sub> | 17.72                        | 1.93                         | -5.43                   |

## Supporting Information for

**Table S8.** Fitted results of the TRPL curves of ST-PSCs with NiO<sub>x</sub> or P3HT|NiO<sub>x</sub> film at short circuit condition.

| Samples               | $A_1$ | $\tau_1$<br>(ns) | $A_2$ | $\tau_2$<br>(ns) | $\tau_{avg}$<br>(ns)* |
|-----------------------|-------|------------------|-------|------------------|-----------------------|
| NiO <sub>x</sub>      | 0.18  | 1.0              | 0.82  | 3.8              | 3.7                   |
| P3HT NiO <sub>x</sub> | 0.15  | 0.8              | 0.85  | 2.9              | 2.8                   |

\*  $\tau_{avg}$  was fitted by the equation:  $\tau_{avg} = (A_1\tau_1^2 + A_2\tau_2^2) / (A_1\tau_1 + A_2\tau_2)$ ,  $i=1, 2$ .

## Supporting Information for

**Table S9.** The reported results of inorganic ST-PSCs in recent years. (Reverse scan)

| Device structures                                                                                | Perovskite bandgaps (eV) | $V_{OC}$ (V) | $J_{SC}$ (mA cm <sup>-2</sup> ) | FF   | PCE (%) | AVT (%) | LUE (%) | Ref       |
|--------------------------------------------------------------------------------------------------|--------------------------|--------------|---------------------------------|------|---------|---------|---------|-----------|
| ITO PTAA PEA-CsPbI <sub>3</sub>  PC <sub>61</sub> BM BCP AZO ITO                                 | 1.78                     | 1.17         | 10.7                            | 0.78 | 9.8     | 31.9    | 3.1     | 2         |
| FTO TiO <sub>2</sub>  CsPbI <sub>3</sub> PQDs Spiro-OMeTAD MoO <sub>x</sub>  Au MoO <sub>x</sub> | 1.78                     | 1.19         | 15.0                            | 0.63 | 11.3    | 23.4    | 2.6     | 3         |
| ITO ZnO CsPbBr <sub>3</sub>  Spiro-OMeTAD PH1000                                                 | 2.30                     | 1.38         | 6.2                             | 0.71 | 6.0     | <43.6   | <2.6    | 4         |
| ITO SnO <sub>2</sub>  CsPbBr <sub>3</sub>  P3HT ITO-NPs Ag-NWs                                   | 2.30                     | 1.32         | 6.3                             | 0.68 | 5.6     | 41.6    | 2.3     | 5         |
| ITO P3CT-N CsPbI <sub>2</sub> Br PCBM C <sub>60</sub>  BCP Ag MoO <sub>x</sub>                   | 1.90                     | 1.11         | 13.2                            | 0.75 | 11.0    | 21.2    | 2.3     | 6         |
| FTO SnO <sub>2</sub>  CsPbIBr <sub>2</sub>  Spiro-OMeTAD MoO <sub>x</sub>  Ag MoO <sub>x</sub>   | 2.08                     | 1.18         | 8.7                             | 0.69 | 7.1     | 29.3    | 2.1     | 7         |
| FTO NiO <sub>x</sub>  CsPbI <sub>3-x</sub> Br <sub>x</sub>  ZnO Al-ZnO ITO                       | N/A                      | 1.00         | 7.9                             | 0.59 | 4.7     | 35.4    | 1.7     | 8         |
| FTO ZnO Ni-ZnO CsPbBr <sub>3</sub>  Spiro-OMeTAD ITO                                             | 2.30                     | 0.94         | 15.0                            | 0.35 | 4.9     | 35.5    | 1.7     | 9         |
| FTO TiO <sub>2</sub>  CsPbI <sub>2</sub> Br Spiro-OMeTAD Ag nanowires                            | 1.90                     | 0.98         | 10.7                            | 0.65 | 6.8     | 22.4    | 1.5     | 10        |
| FTO SnO <sub>2</sub>  CsPbIBr <sub>2</sub>  NiO <sub>x</sub>  ITO                                | 2.08                     | N/A          | N/A                             | N/A  | 3.9     | 33.2    | 1.3     | 11        |
| FTO SnO <sub>2</sub>  CsPbBr <sub>3</sub>  Spiro-OMeTAD MoO <sub>x</sub>  ITO                    | 2.35                     | 1.48         | 8.1                             | 0.70 | 8.4     | 42.8    | 3.6     | This work |
| FTO SnO <sub>2</sub>  CsPbBr <sub>3</sub>  P3HT E-beam NiO <sub>x</sub>  ITO                     | 2.35                     | 1.51         | 6.8                             | 0.69 | 7.1     | 49.1    | 3.5     | This work |

## Supporting Information for

**Table S10.** Photovoltaic performance of ST-PSCs with NiO<sub>x</sub> or P3HT|NiO<sub>x</sub> film prepared by different sputtering powers. All devices were measured under AM 1.5G 1-sun irradiation with a metal mask of 0.16 cm<sup>2</sup>.

| Samples                        |          | $V_{OC}$<br>(V) | $J_{SC}$<br>(mA cm <sup>-2</sup> ) | FF          | PCE<br>(%) |
|--------------------------------|----------|-----------------|------------------------------------|-------------|------------|
| 30 W NiO <sub>x</sub>          | Champion | 1.44            | 6.5                                | 0.61        | 5.7        |
|                                | Average  | 1.41 ± 0.02     | 6.3 ± 0.1                          | 0.61 ± 0.01 | 5.4 ± 0.2  |
| 75 W NiO <sub>x</sub>          | Champion | 1.40            | 6.5                                | 0.59        | 5.4        |
|                                | Average  | 1.38 ± 0.02     | 6.2 ± 0.3                          | 0.58 ± 0.01 | 4.9 ± 0.2  |
| P3HT <br>30 W NiO <sub>x</sub> | Champion | 1.54            | 6.8                                | 0.72        | 7.6        |
|                                | Average  | 1.51 ± 0.02     | 6.8 ± 0.2                          | 0.70 ± 0.01 | 7.1 ± 0.2  |
| P3HT <br>75 W NiO <sub>x</sub> | Champion | 1.51            | 6.8                                | 0.69        | 7.1        |
|                                | Average  | 1.48 ± 0.02     | 6.6 ± 0.1                          | 0.69 ± 0.01 | 6.8 ± 0.1  |

## Supporting Information for

**Table S11.** Photovoltaic performance of ST-PSMs with P3HT|NiO<sub>x</sub> film. All devices were measured under AM 1.5G 1-sun irradiation with a metal mask of 10 cm<sup>2</sup>.

| Samples               |          | $V_{OC}$<br>(V) | $J_{SC}$<br>(mA cm <sup>-2</sup> ) | FF          | PCE<br>(%) |
|-----------------------|----------|-----------------|------------------------------------|-------------|------------|
| P3HT NiO <sub>x</sub> | Champion | 8.42            | 1.0                                | 0.64        | 5.5        |
|                       | Average  | 8.35 ± 0.05     | 1.0 ± 0.02                         | 0.63 ± 0.01 | 5.2 ± 0.15 |

### References

1. H. Yin, P. Lv, B. Gao, Y. Zhang, Y. Zhu, M. Hu, B. Tan, M. Xu, F. Huang, Y.-B. Cheng, A. N. Simonov and J. Lu, *J. Mater. Chem. A*, 2022, **10**, 25652-25660.
2. Z. Zhang, R. Ji, X. Jia, S.-J. Wang, M. Deconinck, E. Siliavka and Y. Vaynzof, *Adv. Funct. Mater.*, 2023, 2307471.
3. J. Kim, D. Kim, W. Kim, S. Woo, S.-W. Baek, M. J. Ko and Y. Kim, *Chem. Eng. J.*, 2023, **469**, 143824.
4. W. Chen, J. Zhang, G. Xu, R. Xue, Y. Li, Y. Zhou, J. Hou and Y. Li, *Advanced Materials*, 2018, **30**, 1800855.
5. B. Parida, S. Yoon and D.-W. Kang, *Nanomaterials*, 2021, **11**, 1489.
6. X. Feng, S. Fu, R. Miao, L. Qian, Y. Kong, H. Ji, L. Ai, J. Fang, W. Wang and W. Song, *Solar Energy Materials and Solar Cells*, 2022, **240**, 111683.
7. Y. Zhao, R. Ge, J. Zheng, L. Chen, X. Wang, Y. Zheng, L. Zhong, Y. Zhu, X. Xu, G. Xu and X. Xiao, *Energy Technol.*, 2023, **11**, 2300611.
8. J. Lin, M. Lai, L. Dou, C. S. Kley, H. Chen, F. Peng, J. Sun, D. Lu, S. A. Hawks, C. Xie, F. Cui, A. P. Alivisatos, D. T. Limmer and P. Yang, *Nat. Mater.*, 2018, **17**, 261-267.
9. T. Das, R. Nag, N. K. Rana, M. Nayak, R. Paramanik, A. Bera, S. K. Saha and A. Guchhait, *Energy Fuels*, 2023, **37**, 10642-10651.
10. X. Yang, J. Han, W. Ruan, Y. Hu, Z. He, X. Jia, S. Zhang and D. Wang, *Chin. Chem. Lett.*, 2022, **33**, 1425-1429.
11. R. Ge, Y. Zhao, C. Jiang, J. Zheng, L. Chen, Y. Zheng, G. Xu and X. Xiao, *Sci. China Mater.*, 2023, **66**, 3261-3270.
